# Supplementary material
Source: PubMed Central journal article supplement (PMC2000537)

# i/t GluR1

□ WT    □ aniso    □ cyclo    □ puro    ■ actino

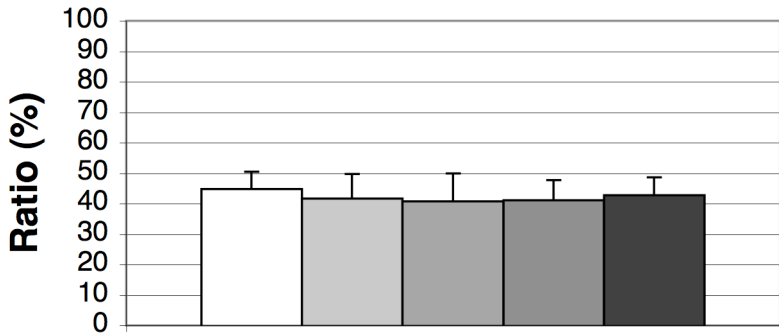

Supplement: pnas_0707484104_1.pdf [file pnas_0707484104_1.pdf]

**A****internalized GluR2**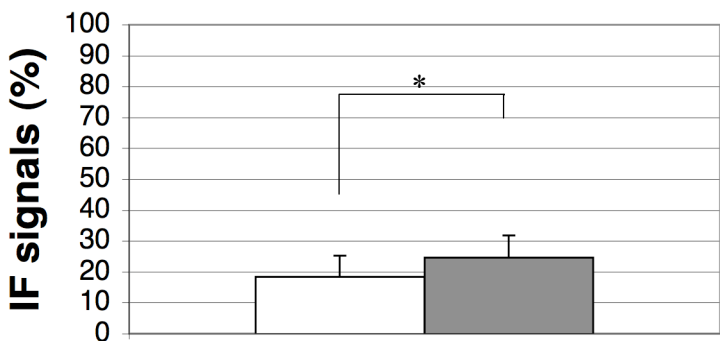**B****surface GluR2**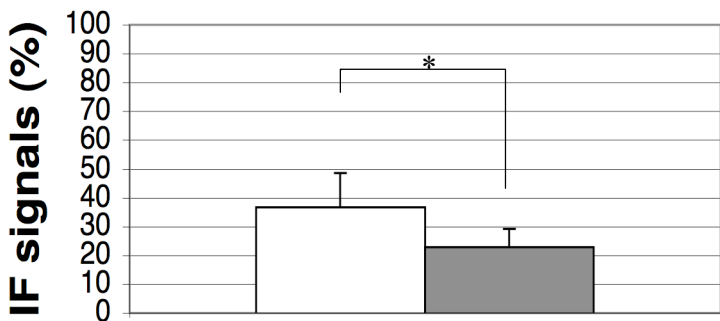**C****i/t GluR2**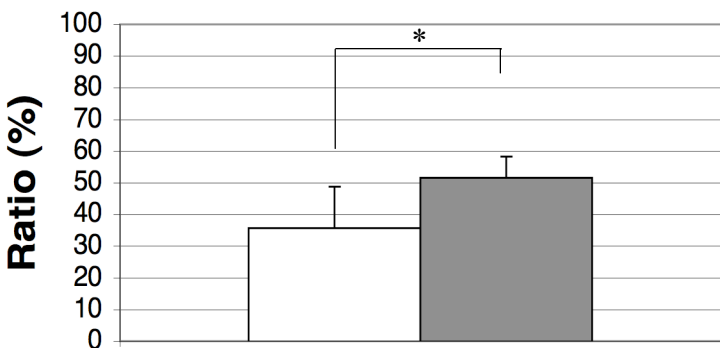

Supplement: pnas_0707484104_2.pdf [file pnas_0707484104_2.pdf]

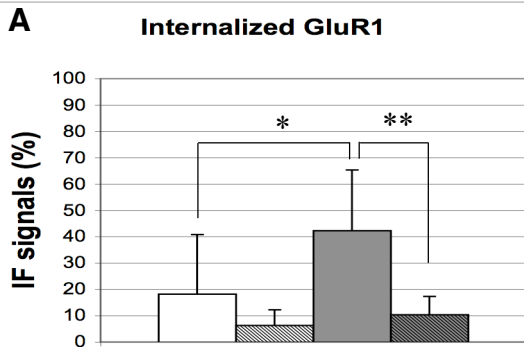

MPEP: - + - +  
siRNA: si-luc si-fmr1

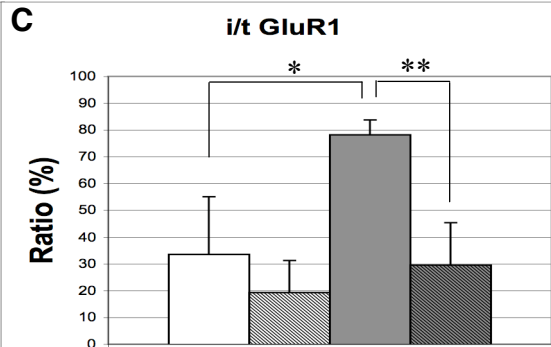

MPEP: - + - +  
siRNA: si-luc si-fmr1

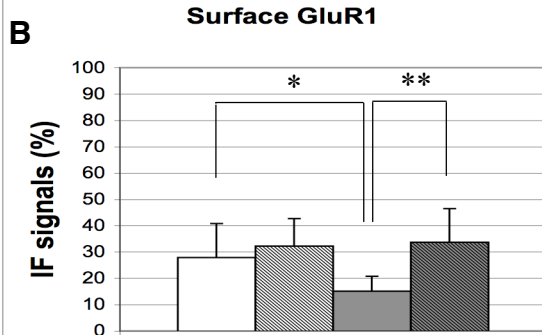

MPEP: - + - +  
siRNA: si-luc si-fmr1

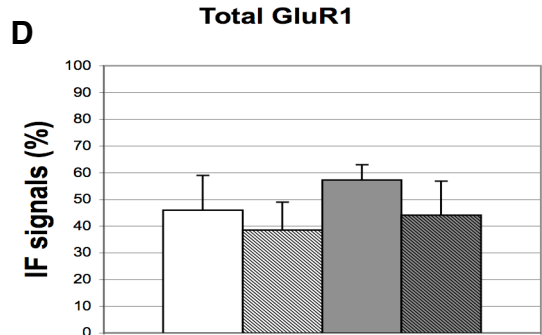

MPEP: - + - +  
siRNA: si-luc si-fmr1

Supplement: pnas_0707484104_3.pdf [file pnas_0707484104_3.pdf]
